# Supplementary material for: Distinct Dispersion of As, Cd, Pb, and Zn in Farmland Soils near Abandoned Mine Tailings: Field Observation Results in South Korea
Source: Hindawi journal article supplement (doi:10.1155/2020/9671871), 2020-08-08
Supplement: f1 [file 9671871.f1.zip]

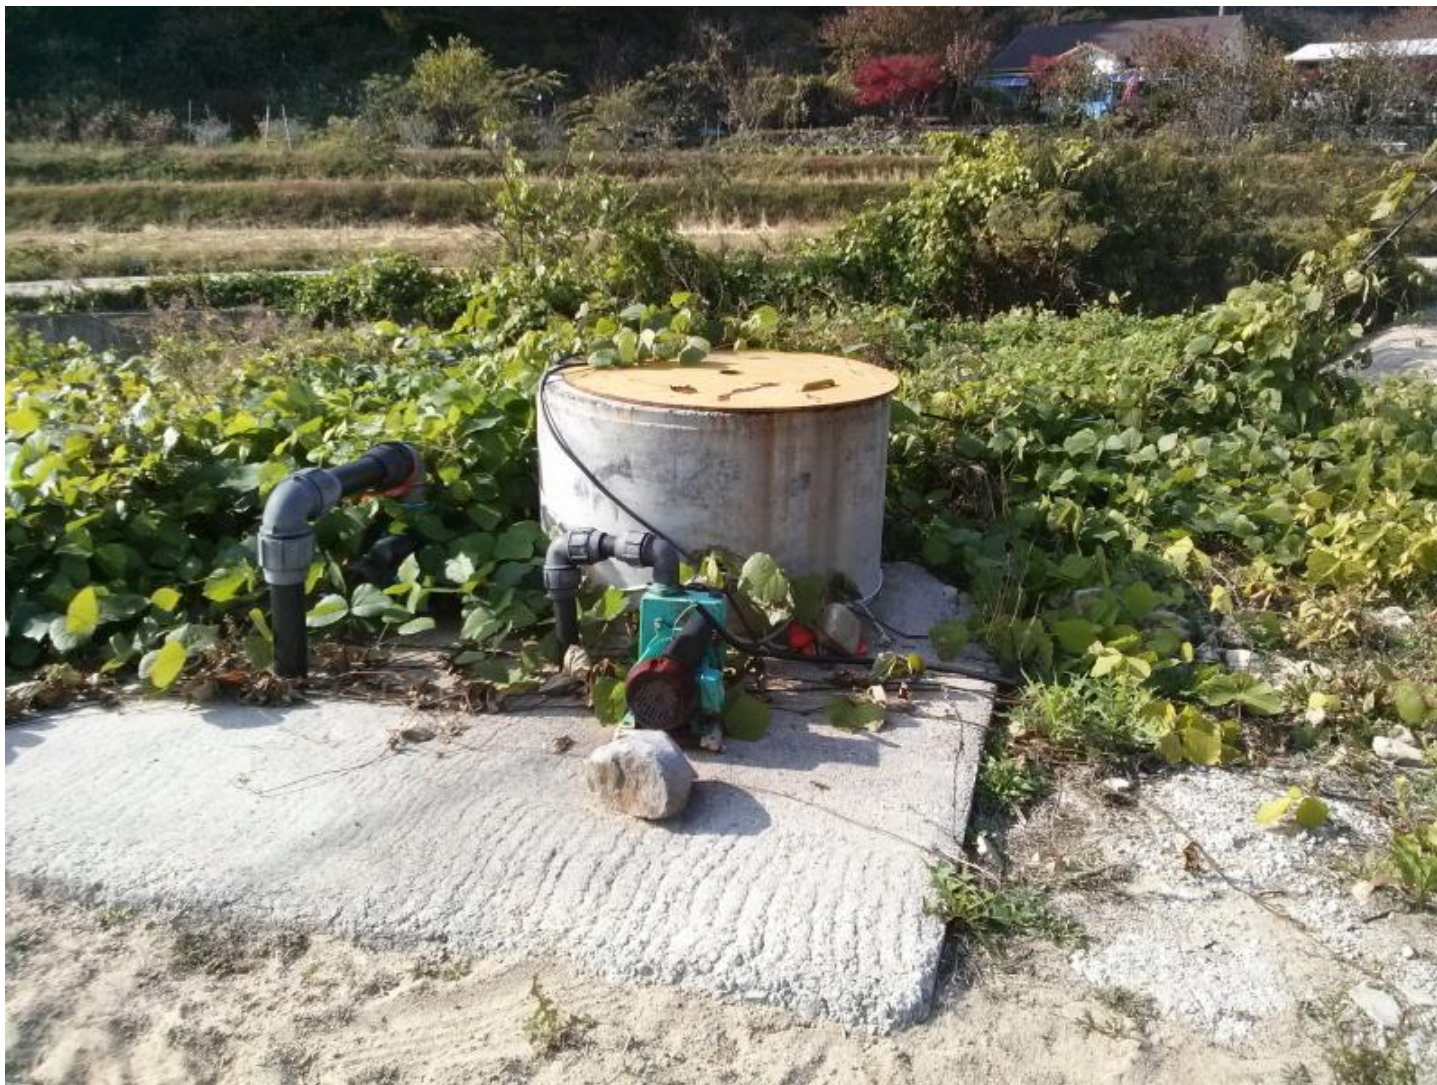

**Figure S1.** Overview of the pumping well for irrigation in the study area.



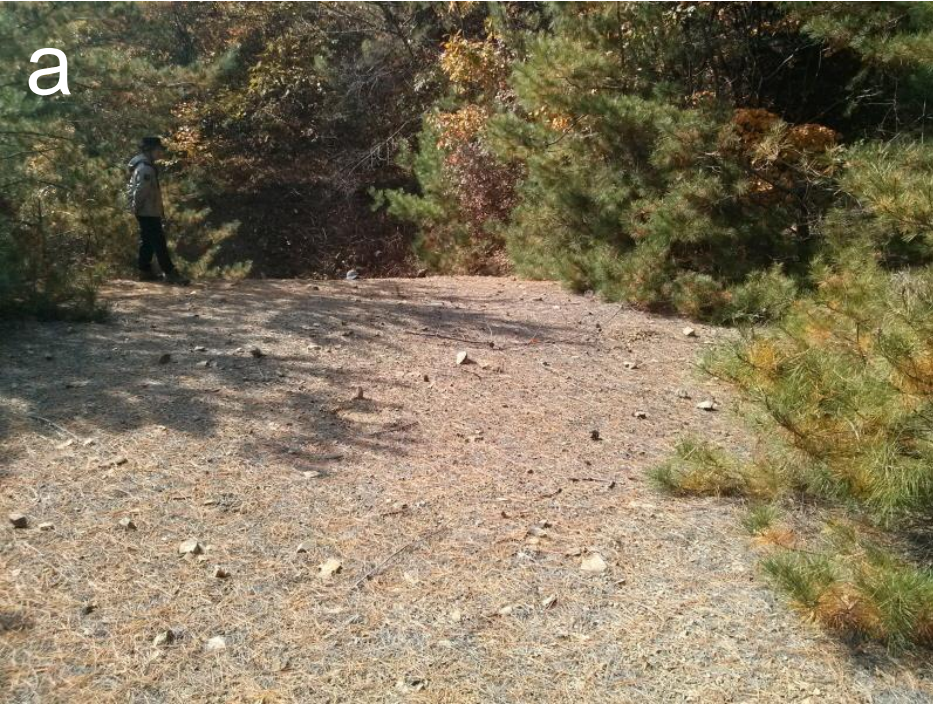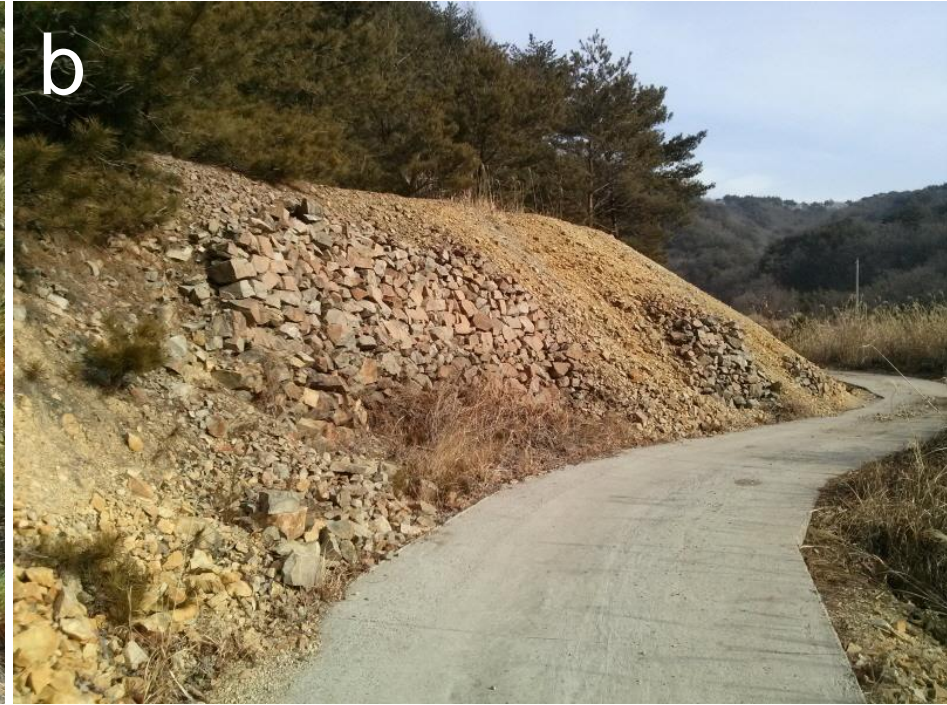

**Figure S2.** Overview of the mine tailing dumps located in the study area. a) Top and b) sides of the mine tailing dumps.

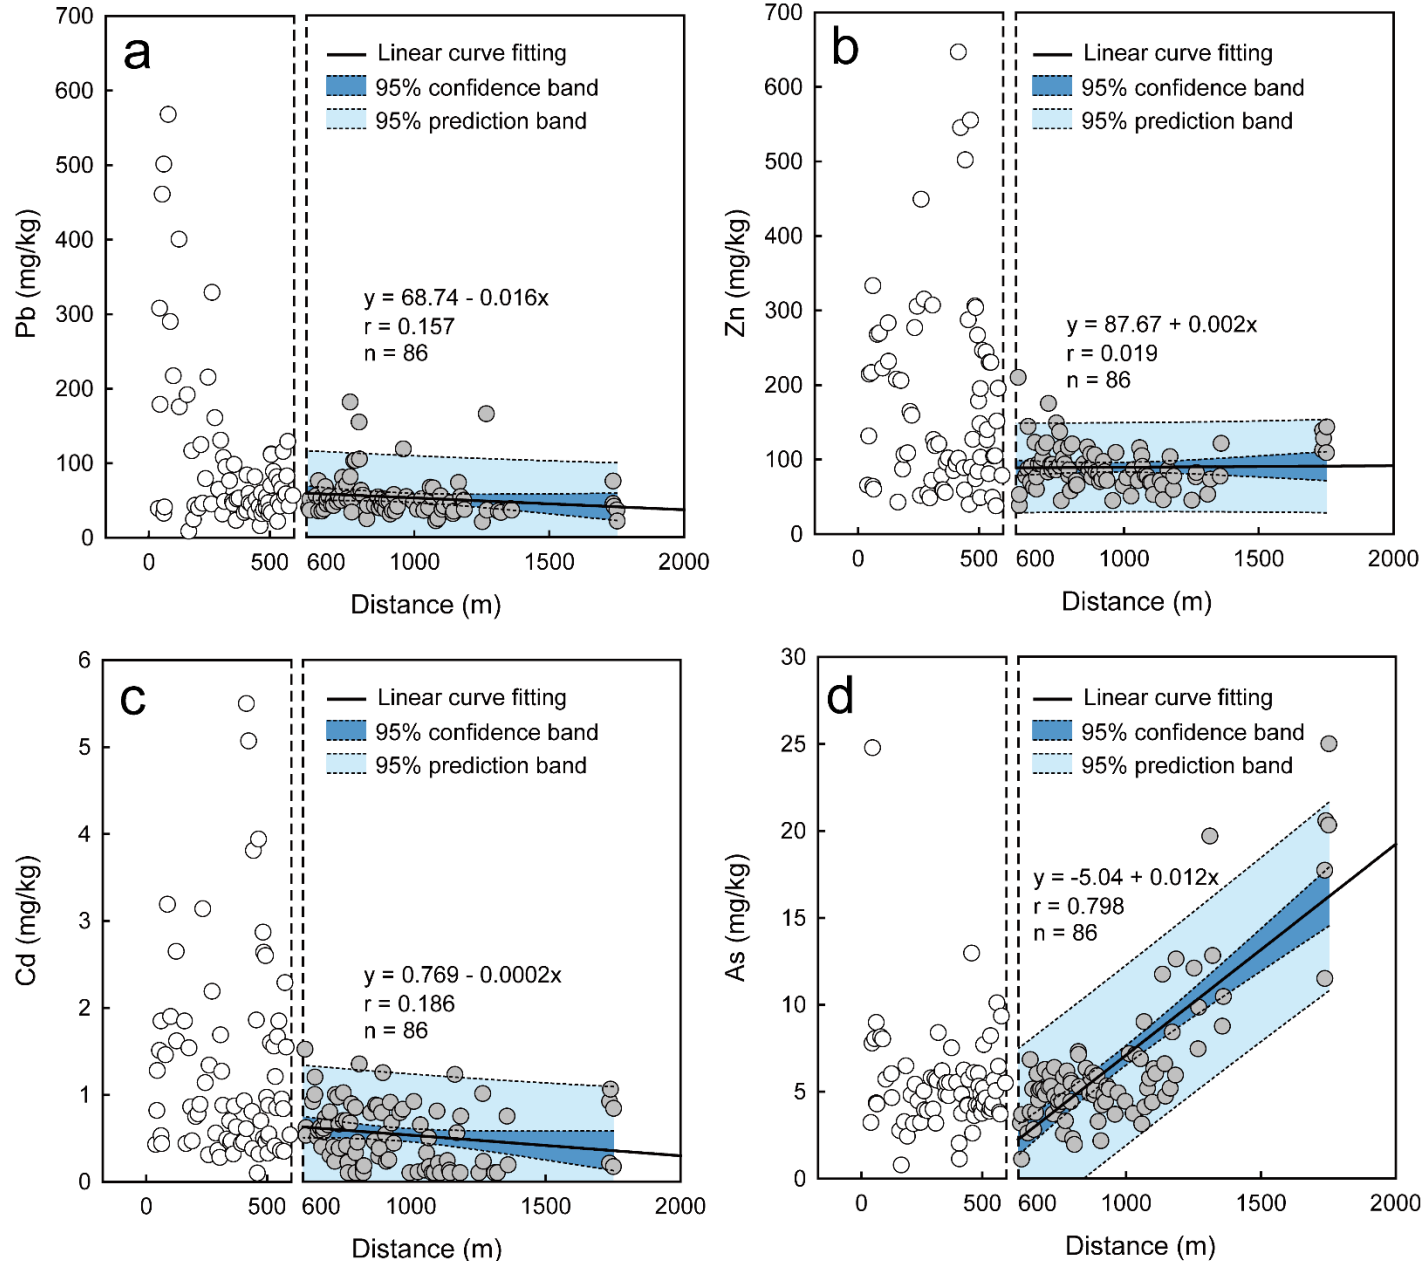

**Figure S3.** Scatter diagrams of metal(loid) concentrations in agricultural soils ( $n = 162$ ) and the increasing distance from the mine tailing dumps. a) Pb, b) Zn, c) Cd, and d) As. ○: < 600 m and ●: > 600 m.
